1                    **Individual repeatability and heritability of divorce in a wild population**

2

3    Ryan R. Germain<sup>1,2†</sup>, Matthew E. Wolak<sup>1,3†</sup>, and Jane M. Reid<sup>1</sup>

4

5    <sup>1</sup>School of Biological Sciences, University of Aberdeen, Aberdeen, UK

6

7    *Current addresses:*

8    <sup>2</sup>Lab of Ornithology, Cornell University, Ithaca, NY, USA

9    <sup>3</sup>Department of Biological Sciences, Auburn University, Auburn, AL, USA

10    <sup>†</sup>Equal author contributions

11

12    **Authors for correspondence:**

13    Ryan Germain

14    email: *ryan.r.germain@gmail.com*

15    Matthew Wolak

16    email: *matthew.wolak@auburn.edu*

17

18    **Subject Areas:**

19    behaviour, evolution, ecology

20

21    **Keywords:** indirect genetic effects, mating system evolution, social monogamy, quantitative  
22    genetics

23

24 **ABSTRACT**

25 Understanding micro-evolutionary responses of mating systems to contemporary selection  
26 requires estimating sex-specific additive genetic variances and cross-sex genetic covariances in  
27 key reproductive strategy traits. One key trait comprises the occurrence of divorce versus mate-  
28 fidelity across sequential reproductive attempts. If divorce represents an evolving behavioural  
29 strategy it must have non-zero individual repeatability and heritability, but quantitative estimates  
30 from wild populations are scarce. We used 39 years of individual breeding records and pedigree  
31 data from free-living song sparrows (*Melospiza melodia*) to quantify sex-specific permanent  
32 individual and additive genetic variances, and hence estimate repeatability and heritability, in  
33 liability for divorce. We estimated moderate repeatability in females, but little repeatability in  
34 males. Estimates of additive genetic variance were small in both sexes, and the cross-sex genetic  
35 covariance was close to zero. The total heritability was likely non-zero but small, indicating low  
36 potential for micro-evolutionary response to selection. Rapid micro-evolution of divorce rate  
37 therefore appears unlikely, even if there were substantial fitness benefits of divorce and resulting  
38 selection.

## 39 INTRODUCTION

40 Pair-bond resilience, resulting from mate-fidelity (i.e. maintaining pair-bonds over multiple  
41 breeding attempts) versus divorce (i.e. dissolving pair-bonds to re-pair with a new mate) [1,2], is  
42 a key feature of animal mating systems [3] that results from sexual selection and can  
43 fundamentally influence the distribution of offspring across parents and the resulting population-  
44 wide distribution of fitness. Divorce occurs in numerous taxa and may increase individual fitness  
45 by counter-acting constraints on initial mate choice, and hence be adaptive [2,4]. However, if  
46 there is to be ongoing adaptive micro-evolution of divorce rate [2,5–7], then individual liability  
47 for divorce must vary consistently among individuals (i.e., have non-zero individual  
48 repeatability) and have non-zero heritability.

49 In general, repeatable expression of mating and reproductive traits implies that selection  
50 may act consistently on individuals over their lifetimes, and defines the maximum possible  
51 heritability [8,9]. Decomposing phenotypic variance into repeatable individual variance ( $V_I$ ),  
52 additive genetic variance ( $V_A$ ), and environmental variance allows estimation of heritability and,  
53 in principle, indicates the potential for micro-evolutionary responses to selection [10]. However,  
54 divorce represents an interesting class of jointly-expressed traits that require female-male  
55 interactions, and hence can be influenced by genetic effects of both sexes. Further, correlated  
56 expression of sex-specific genetic effects, leading to non-zero cross-sex genetic covariance  
57 ( $COV_{A\text{♀}\text{♂}}$ ), can generate evolutionary sexual conflict (e.g. [11]). Understanding the evolutionary  
58 causes and consequences of divorce therefore requires explicit estimation of sex-specific  $V_A$   
59 ( $V_{A\text{♀}}$  and  $V_{A\text{♂}}$ ), and  $COV_{A\text{♀}\text{♂}}$ , in populations experiencing un-manipulated natural and sexual  
60 selection environments.

61 Analytical advances mean that  $V_{A\text{♀}}$ ,  $V_{A\text{♂}}$ , and  $\text{COV}_{A\text{♀♂}}$  underlying jointly-expressed  
62 traits can be estimated from complex relatedness structures arising in wild populations (e.g.[10]).  
63 Since divorce versus mate-fidelity represent alternative outcomes of pairing decisions across  
64 consecutive breeding attempts, divorce is appropriately modelled as a ‘threshold trait’, where  
65 breeding pairs’ underlying continuous liabilities for divorce translate into expression at some  
66 threshold (e.g. [12]). Such models also permit estimation of ‘total heritability’ of divorce, which  
67 represents the overall potential for micro-evolutionary responses to selection on the population-  
68 wide distribution of liabilities [13]. Such analyses require phenotypic observations of divorce  
69 versus mate-fidelity, conditional on survival between consecutive breeding attempts, from  
70 diverse relatives [14]. We use 39 years of comprehensive observations of free-living song  
71 sparrows (*Melospiza melodia*) to estimate (i) population-level divorce rate, (ii)  $V_{A\text{♀}}$ ,  $V_{A\text{♂}}$  and  
72  $\text{COV}_{A\text{♀♂}}$  in divorce, and (iii) individual repeatability and the sex-specific and total heritability,  
73 thereby assessing the potential for ongoing evolution of this reproductive strategy.

74

## 75 MATERIAL AND METHODS

76 A resident population of individually colour-ringed song sparrows on Mandarte Island, Canada  
77 has been intensively studied since 1975. All individuals alive in late April (typical start of  
78 breeding [15]) are recorded in a comprehensive census to determine over-winter survival and  
79 pairing status (re-sighting probability >0.99 [16]), and all breeding attempts are closely  
80 monitored (Electronic Supplemental Material S1). Females and males form socially persistent  
81 pairings that cooperate to rear offspring (1–4 broods per year), but can form new pairings within  
82 and between breeding seasons following divorce or mate-death.

83 To identify cases of divorce versus mate-fidelity, we extracted each female's lifetime  
84 sequence of breeding events ( $\geq 1$  egg laid) where re-pairing could have occurred (i.e. she initiated  
85 a subsequent breeding event) and categorized these events as divorce, mate-fidelity or mate-  
86 death according to the fate of the pair-bond and whether her current mate was still alive during  
87 her subsequent event (ESMS1). Instances of mate-death were identified from daily field  
88 observations and the April census, and excluded from our dataset.

89 We fitted two generalized linear mixed models to decompose total variance in liability for  
90 divorce into permanent individual and additive genetic components. Model 1 estimated variances  
91 attributable to permanent effects of individual females ( $V_{I\text{♀}}$ ), males ( $V_{I\text{♂}}$ ), social pairs ( $V_S$ ), and  
92 the year when a focal breeding event occurred ( $V_Y$ ). Model 2 utilised comprehensive pedigree  
93 information (ESMS2) to additionally estimate  $V_{A\text{♀}}$ ,  $V_{A\text{♂}}$ , and  $\text{COV}_{A\text{♀♂}}$  in liability for divorce  
94 (i.e. an 'animal model' [10]).  $\text{COV}_{A\text{♀♂}}$  is the covariance between additive genetic effects of  
95 alleles expressed in all females versus all males, not the genetic covariance between a female and  
96 her socially-paired mate (e.g. [15,17]; ESMS3). Fixed effects were restricted to a two-level  
97 factor that defined whether an observation spanned breeding events separated by the non-  
98 breeding season ('between-season') versus consecutive events within the same season ('within-  
99 season', ESMS1) and separate regressions on female and male individual coefficients of  
100 inbreeding ( $f$ ) (Model 2 only), thereby estimating inbreeding depression in liability for divorce  
101 and minimising any associated bias in estimated  $V_A$  [18]. Phenotypic observations were  
102 restricted to individuals with known grandparents to minimise under-estimation of  $f$  (ESMS3).  
103 Sex-specific repeatabilities in liability for divorce were estimated from Model 1 as:

104 
$$\text{Repeatability} = \frac{V_I}{V_{P\_Model1}}$$

105 Sex-specific heritabilities ( $h^2$ ) were estimated from Model 2 as:

106 
$$h^2 = \frac{V_A}{V_{P\_Model2}}$$

107 The 'total heritability' ( $T^2$ ) was calculated from Model 2 as:

108 
$$T^2 = \frac{V_{A\varphi} + V_{A\sigma} + 2(COV_{A\varphi\sigma})}{V_{P\_Model2}}$$

109 Total variance in liability ( $V_{P\_Model 1}$ ,  $V_{P\_Model 2}$ ) was calculated separately for each model  
110 (ESMS3). Models were fitted using Bayesian inference in R. Posterior distributions of  
111 repeatabilities, heritabilities, and  $T^2$  were calculated from marginal posterior distributions of  
112 underlying variance components. We report liability-scale posterior modes, means and 95%  
113 credible intervals (95%CI) from 5000 posterior samples. Estimates were obtained using  
114 uninformative priors and were robust to alternative model specifications (ESMS5).

115

## 116 **RESULTS**

117 There were 1,419 breeding events where divorce could have occurred, involving 566 unique  
118 social pairings among 358 females and 341 males. Divorce occurred on 166 (11.7%) occasions  
119 (details in ESMS1).

120 Model 1 revealed that the largest component of variance in liability for divorce was  
121  $V_{I\varphi}$ , while  $V_{I\sigma}$  was comparatively small (table 1, ESMS4). Because  $V_S$  and  $V_Y$  were also small,  
122 female repeatability for divorce was moderate (~16%; table 1). The lower 95%CI limit  
123 converged towards zero, but 98% of the posterior distribution exceeded 0.01, departing from the

124 prior distribution (figure 1a), and indicating that female repeatability is most likely greater than  
125 zero. In contrast, male repeatability was smaller (table 1); only 76% of the posterior distribution  
126 exceeded 0.01 (figure 1b). Divorce was less likely to occur within- than between-seasons (table  
127 1).

128 Model 2 showed that  $V_{A\text{♀}}$  and  $V_{A\text{♂}}$  in liability for divorce were both small, and  
129  $\text{COV}_{A\text{♀♂}}$  was estimated as close to zero (table 1, ESMS4). Sex-specific heritabilities were  
130 therefore small for both females and males, yet noticeably different from the prior distributions  
131 (particularly at the posterior means, figure 2a,b). However,  $V_{A\text{♀}}$ ,  $V_{A\text{♂}}$ , and  $\text{COV}_{A\text{♀♂}}$  still  
132 combine to generate a small but likely non-zero total heritability ( $T^2$ ) for divorce (table 1); 92%  
133 of the posterior distribution exceeded 0.01 (ESMS5), again deviating from the prior distribution  
134 (figure 2c). Liability for divorce tended to increase with increasing  $f$ , especially in females, but  
135 the 95% CIs overlapped zero (table 1).

136

## 137 **DISCUSSION**

138 The ~12% divorce rate observed in song sparrows is relatively low compared to other temperate-  
139 breeding passerine birds (~20–50%; [14,19,20]). However, there was evidence of moderate  $V_{I\text{♀}}$   
140 and hence female repeatability, but lower  $V_{I\text{♂}}$  and male repeatability, in liability for divorce  
141 (figure 1a,b, ESMS4). These estimates imply that sex-specific  $h^2$  is not *a priori* zero. However,  
142  $h^2$  was estimated to be small in both sexes.

143 Most previous quantitative genetic analyses of divorce come from human twin-studies,  
144 and show relatively high heritabilities when divorce is defined as a sex-specific trait (e.g. 0.3–0.6  
145 [21,22]). However, such estimates may be inflated by shared environmental and cultural effects

146 [10], and often only consider whether individuals ever divorced over their lifetime. Our focus on  
147 sequential breeding events, considering among-individual variances across repeat observations,  
148 allows estimation of individual repeatability as well as pair and year variances, which account  
149 for population or environmental changes that could otherwise bias heritability estimates. The  
150 only previous quantitative genetic analysis of divorce in a wild (non-human) population,  
151 similarly estimated low female heritability in savannah sparrows (*Passerculus sandwichensis*)  
152 [14]. Because [14] could not distinguish their estimate of repeatability for divorce in males from  
153 zero, heritability estimates were restricted to females and did not consider potential contributions  
154 of  $V_{A\sigma}$  or  $COV_{A\sigma\phi}$ . Our results suggest that both song sparrow sexes contribute to the total  
155 additive genetic variance, and hence to the total heritability for divorce ( $T^2$ ). Thus the overall  
156 potential for micro-evolutionary responses to selection in this reproductive strategy is greater  
157 when considering the interactive effects of the sexes jointly than when considering a single sex  
158 alone.

159           Many studies have investigated the potential costs and benefits of divorce in wild  
160 populations, particularly in socially-monogamous birds (reviews: [2,4,6]). While divorce is  
161 generally considered adaptive in terms of improving an individual's subsequent breeding success  
162 under certain conditions [2,4], responses to selection and hence ongoing micro-evolution require  
163 contemporary  $V_A$ . Our results indicate that such  $V_A$ , and consequent potential for evolutionary  
164 response to selection, may be smaller than is often implicitly assumed [2,5–7]. Further, low  
165 divorce rates will intrinsically limit the intensity of selection [12]. Overall, rapid and marked  
166 micro-evolutionary changes in the frequency of divorce appear unlikely, even if divorce were  
167 beneficial for one or both members of a breeding pair.

168



169

## 170 **Ethics**

171 All field procedures approved by the University of British Columbia Animal Care Committee  
172 ethical review (certificates UBCACC A12-0229 and A14-0336).

173

## 174 **Data accessibility**

175 Data are available from Dryad (doi: upon acceptance).

176

## 177 **Authors' contributions**

178 RRG and MEW designed the study and conducted analyses with input from JMR, all authors  
179 contributed to writing.

180

## 181 **Competing interests**

182 We declare no competing interests.

183

## 184 **Funding**

185 All authors were supported by a European Research Council grant to JMR. Fieldwork was  
186 supported by the Natural Sciences and Engineering Research Council of Canada and the  
187 University of British Columbia.

188

## 189 **Acknowledgments**

190 We thank the Tsawout and Tseycum First Nation bands for access to Mandarte, Peter Arcese,  
191 Lukas Keller, Pirmin Nietlisbach, and the University of Aberdeen Maxwell High Performance  
192 Computing cluster.

193

## 194 **References**

- 195 1. Black JM. 1996 *Partnerships in Birds - The Study of Monogamy*. Oxford: Oxford  
196 University Press.
- 197 2. Culina A, Radersma R, Sheldon BC. 2015 Trading up: the fitness consequences of divorce  
198 in monogamous birds. *Biol. Rev.* **90**, 1015–1034. (doi:10.1111/brv.12143)
- 199 3. Sakai AK, Westneat DF. 2001 Mating Systems. In *Evolutionary Ecology* (eds CW Fox,  
200 DA Roff, DJ Fairbairn), pp. 193–206. New York: Oxford University Press.
- 201 4. Dubois F, Cézilly F. 2002 Breeding success and mate retention in birds: a meta-analysis.  
202 *Behav. Ecol. Sociobiol.* **52**, 357–364. (doi:10.1007/s00265-002-0521-z)
- 203 5. Diamond JM. 1987 A darwinian theory of divorce. *Nature* **329**, 765–766.
- 204 6. Choudhury S. 1995 Divorce in birds: a review of the hypotheses. *Anim. Behav.* **50**, 413–  
205 429. (doi:10.1006/anbe.1995.0256)

- 206 7. McNamara JM, Forslund P. 1996 Divorce rates in birds: predictions from an optimization  
207 model. *Am. Nat.* **147**, 609–640. (doi:10.1086/285869)
- 208 8. Boake CRB. 1989 Repeatability: Its role in evolutionary studies of mating behavior. *Evol.*  
209 *Ecol.* **3**, 173–182. (doi:10.1007/BF02270919)
- 210 9. Dingemans NJ, Dochtermann NA. 2013 Quantifying individual variation in behaviour:  
211 mixed-effect modelling approaches. *J. Anim. Ecol.* **82**, 39–54. (doi:10.1111/1365-  
212 2656.12013)
- 213 10. Kruuk LEB. 2004 Estimating genetic parameters in natural populations using the ‘animal  
214 model’. *Philos. Trans. R. Soc. London B* **359**, 873–890. (doi:10.1098/rstb.2003.1437)
- 215 11. Bonduriansky R, Chenoweth SF. 2009 Intralocus sexual conflict. *Trends Ecol. Evol.* **24**,  
216 280–288. (doi:10.1016/J.TREE.2008.12.005)
- 217 12. Roff DA. 1996 The evolution of threshold traits in animals. *Q. Rev. Biol.* **71**, 3–35.  
218 (doi:10.1086/419266)
- 219 13. Bijma P, Muir WM, Van Arendonk JAM. 2007 Multilevel selection 1: quantitative  
220 genetics of inheritance and response to selection. *Genetics* **175**, 277–288.  
221 (doi:10.1534/genetics.106.062711)
- 222 14. Wheelwright NT, Teplitsky C. 2017 Divorce in an island bird population: causes,  
223 consequences, and lack of inheritance. *Am. Nat.* **190**, 557–569. (doi:10.1086/693387)
- 224 15. Germain RR, Wolak ME, Arcese P, Losdat S, Reid JM. 2016 Direct and indirect genetic  
225 and fine-scale location effects on breeding date in song sparrows. *J. Anim. Ecol.* **85**, 1613–  
226 1624. (doi:10.1111/1365-2656.12575)
- 227 16. Wilson S, Norris DR, Wilson AG, Arcese P. 2007 Breeding experience and population  
228 density affect the ability of a songbird to respond to future climate variation. *Proc. R. Soc.*

- 229 *London B* **274**, 2539–2545. (doi:10.1098/rspb.2007.0643)
- 230 17. Wolak ME, Reid JM. 2016 Is pairing with a relative heritable? Estimating female and  
231 male genetic contributions to the degree of biparental inbreeding in song sparrows  
232 (*Melospiza melodia*). *Am. Nat.* **187**, 736–752. (doi:10.1086/686198)
- 233 18. Reid JM, Keller LF. 2010 Correlated inbreeding among relatives: occurrence, magnitude,  
234 and implications. *Evolution* **64**, 973–985. (doi:10.1111/j.1558-5646.2009.00865.x)
- 235 19. Lindén M. 1991 Divorce in great tits -- chance or choice? An experimental approach. *Am.*  
236 *Nat.* **138**, 1039–1048. (doi:10.1086/285267)
- 237 20. Ramsay SM, Otter KA, Mennill DJ, Ratcliffe LM, Boag PT. 2000 Divorce and extrapair  
238 mating in female black-capped chickadees (*Parus atricapillus*): separate strategies with a  
239 common target. *Behav. Ecol. Sociobiol.* **49**, 18–23. (doi:10.1007/s002650000270)
- 240 21. Jocklin V, McGue M, Lykken DT. 1996 Personality and divorce: a genetic analysis. *J.*  
241 *Pers. Soc. Psychol.* **71**, 288–99. (doi:10.1037//0022-3514.71.2.288)
- 242 22. Jerskey BA, Panizzon MS, Jacobson KC, Neale MC, Grant MD, Schultz M, Eisen SA,  
243 Tsuang MT, Lyons MJ. 2010 Marriage and divorce: a genetic perspective. *Pers. Individ.*  
244 *Dif.* **49**, 473–478. (doi:10.1016/j.paid.2010.05.007)
- 245

246 **Table 1:** Marginal posterior modes, means and 95% CIs from models decomposing the liability  
247 for divorce.  $V_I$  and  $V_A$  represent permanent individual and additive genetic variances for females  
248 ( $\text{♀}$ ) and males ( $\text{♂}$ ).  $\text{COV}_{A\text{♀♂}}$  is the cross-sex genetic covariance.  $V_S$  and  $V_Y$  are the social pair  
249 and year variances, respectively. Posterior statistics for sex-specific repeatabilities and  
250 heritabilities ( $h^2$ ), ‘total heritability’ ( $T^2$ ), fixed effects of within- versus between-season and  
251 regressions on individual female or male coefficient of inbreeding ( $f$ ) are also shown.

252

|                             | Model 1      |                           | Model 2         |                           |
|-----------------------------|--------------|---------------------------|-----------------|---------------------------|
|                             | mode, mean   | 95%CI                     | mode, mean      | 95%CI                     |
| <b>variance components</b>  |              |                           |                 |                           |
| $V_{I\text{♀}}$             | 0.24, 0.28   | $4 \times 10^{-6}$ , 0.53 | 0.003, 0.22     | $6 \times 10^{-7}$ , 0.48 |
| $V_{I\text{♂}}$             | 0.001, 0.09  | $5 \times 10^{-8}$ , 0.26 | 0.002, 0.08     | $4 \times 10^{-8}$ , 0.25 |
| $V_S$                       | 0.001, 0.14  | $2 \times 10^{-9}$ , 0.46 | 0.003, 0.15     | $4 \times 10^{-8}$ , 0.48 |
| $V_Y$                       | 0.001, 0.07  | $4 \times 10^{-7}$ , 0.19 | 0.001, 0.07     | $8 \times 10^{-9}$ , 0.19 |
| $V_{A\text{♀}}$             |              |                           | 0.001, 0.07     | $5 \times 10^{-9}$ , 0.25 |
| $V_{A\text{♂}}$             |              |                           | 0.001, 0.08     | $4 \times 10^{-8}$ , 0.21 |
| $\text{COV}_{A\text{♀♂}}$   |              |                           | -0.0002, -0.003 | -0.08, 0.06               |
| <b>variance ratios</b>      |              |                           |                 |                           |
| repeatability $_{\text{♀}}$ | 0.16, 0.17   | $3 \times 10^{-6}$ , 0.30 |                 |                           |
| repeatability $_{\text{♂}}$ | 0.001, 0.05  | $3 \times 10^{-8}$ , 0.15 |                 |                           |
| $h^2_{\text{♀}}$            |              |                           | 0.001, 0.04     | $2 \times 10^{-9}$ , 0.14 |
| $h^2_{\text{♂}}$            |              |                           | 0.001, 0.04     | $3 \times 10^{-8}$ , 0.12 |
| $T^2$                       |              |                           | 0.02, 0.08      | $1 \times 10^{-4}$ , 0.20 |
| <b>fixed effects</b>        |              |                           |                 |                           |
| intercept                   | -0.64, -0.66 | -0.89, -0.44              | -0.81, -0.90    | -1.28, -0.59              |
| within-season               | -1.08, -1.10 | -1.34, -0.85              | -1.11, -1.12    | -1.37, -0.87              |
| $f_{\text{♀}}$              |              |                           | 1.92, 1.98      | -0.66, 4.45               |
| $f_{\text{♂}}$              |              |                           | 0.59, 0.94      | -1.72, 3.61               |

253

254 **Figure 1.** Marginal posterior samples (bars), density (solid black line), mean (red dotted line)  
255 and 95%CI limits (dashed lines) of sex-specific repeatabilities for divorce in (a) female and (b)  
256 male song sparrows. Blue lines illustrate prior distributions (ESMS5).

257 **Figure 2.** Marginal posterior distributions for (a) female and (b) male heritabilities ( $h^2$ ), and (c)  
258 the total heritability ( $T^2$ ) for divorce in song sparrows. See figure 1 for plot description.

259

260 Figure 1

261

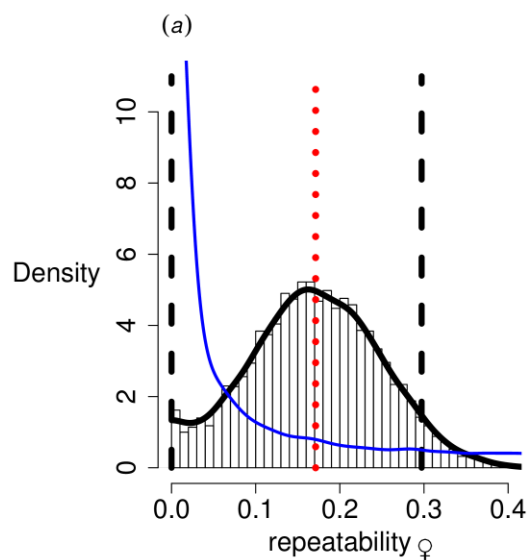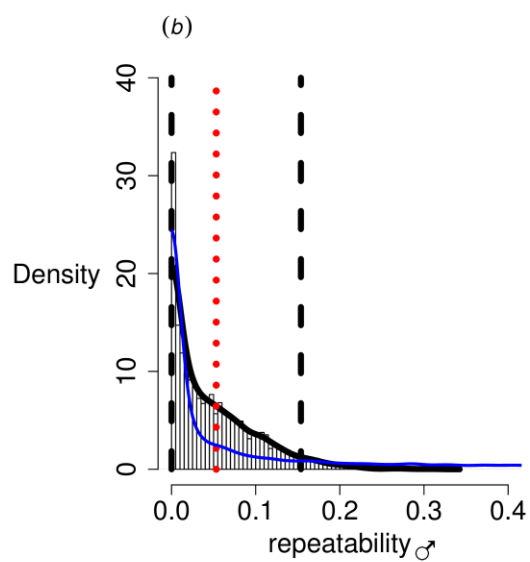

262

263



264 Figure 2

265

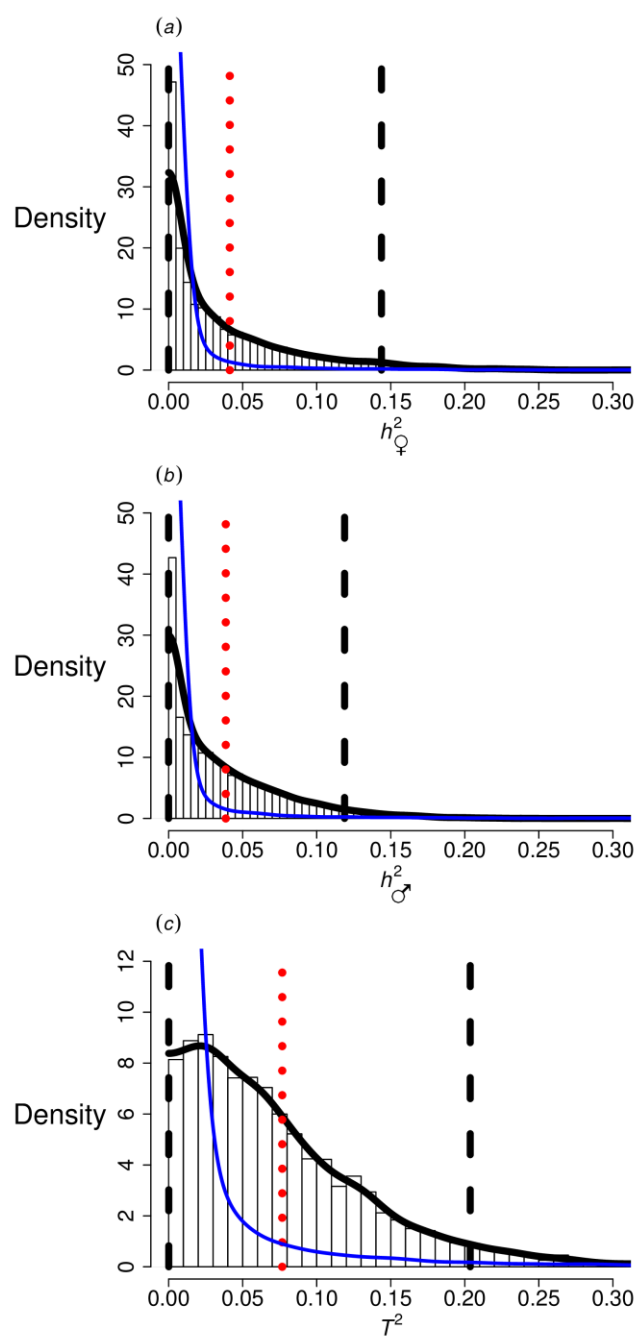

266

267
